# Supplementary material for: Headache service quality: evaluation of quality indicators in 14 specialist-care centres
Source: Springer Nature journal article supplement (doi:10.1186/s10194-016-0707-9), 2016-12-01
Supplement: MOESM1 [file 11806216]

10.03.2014

**Lifting The Burden**  
in Official Relations  
with the World Health Organization

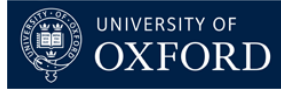

Add logo of local  
collaborator

The Global Campaign against Headache

## Research Project: Evaluation of headache service quality

[list the local collaborator(s)]

---

### Doctors' questionnaire

Under the auspices of the Global Campaign against Headache, headache centres in Europe and the United States, and the University of Oxford in the UK, are collaborating to define and measure *quality* of headache care. This is a step towards making improvements in headache care at local, national and international levels.

A multi-dimensional definition of quality has been agreed, along with a set of quality indicators. This study is an evaluation of the quality indicators implemented in specialist headache centres. Health-care providers, patients and administrative staff are asked to complete short questionnaires, and a review of randomly selected patients' records is conducted.

If the study is successful, it will be followed by studies in other settings, including primary care. Ultimately, the quality indicators, once validated, will be used to improve headache services.

There are five short questionnaires. This one of 19 questions is aimed at doctors. Please complete it by ticking the relevant box for each question. Once you have done so, please return it to [local collaborator].

First please indicate whether you are:

Staff doctor            Trainee     

and the date of completion:      \_\_\_\_/\_\_\_\_/20\_\_

|                                                                                                                                                                                                                                                                                                                                                                                        | <b>Office<br/>use<br/>only</b> |
|----------------------------------------------------------------------------------------------------------------------------------------------------------------------------------------------------------------------------------------------------------------------------------------------------------------------------------------------------------------------------------------|--------------------------------|
| <p><b>1. Is it routine practice in your headache service to review a patient's diagnosis during follow-up?</b></p> <p><input type="radio"/> yes<br/> <input type="radio"/> no<br/> <input type="radio"/> don't know</p>                                                                                                                                                                | <b>A5</b>                      |
| <p><b>2. Are diagnostic diaries available in your headache service?</b></p> <p><input type="radio"/> yes<br/> <input type="radio"/> no<br/> <input type="radio"/> don't know</p>                                                                                                                                                                                                       | <b>A6b</b>                     |
| <p><b>3. Does a formal triage system exist in your headache service?</b><br/>           (this means any system during the first telephone contact, or on receipt of a referral letter, that identifies patients' particular needs and reacts accordingly)</p> <p><input type="radio"/> yes<br/> <input type="radio"/> no (go to 5)<br/> <input type="radio"/> don't know (go to 5)</p> | <b>B1a</b>                     |
| <p><b>4. Is your triage system designed to pick out potentially urgent cases for early appointments?</b><br/>           (for example, patients with cluster headache)</p> <p><input type="radio"/> yes<br/> <input type="radio"/> no<br/> <input type="radio"/> don't know</p>                                                                                                         | <b>B1a</b>                     |
| <p><b>5. Are you satisfied that sufficient time is allocated to each patient's visit to enable a good management?</b></p> <p><input type="radio"/> yes<br/> <input type="radio"/> no</p>                                                                                                                                                                                               | <b>B2c</b>                     |
| <p><b>6. Does an access route to psychological therapies exist in your headache service?</b><br/>           (these may be provided within your own service or by direct referral to another service)</p> <p><input type="radio"/> yes<br/> <input type="radio"/> no<br/> <input type="radio"/> don't know</p>                                                                          | <b>B4b</b>                     |

|                                                                                                                                                                                                                            |                   |
|----------------------------------------------------------------------------------------------------------------------------------------------------------------------------------------------------------------------------|-------------------|
| <p><b>7. Is an instrument for disability assessment available in your headache service?</b></p> <p><input type="radio"/> yes</p> <p><input type="radio"/> no</p> <p><input type="radio"/> don't know</p>                   | <p><b>B5b</b></p> |
| <p><b>8. Does your headache service allow follow-up of every patient who needs it?</b></p> <p><input type="radio"/> yes</p> <p><input type="radio"/> no</p> <p><input type="radio"/> don't know</p>                        | <p><b>B6a</b></p> |
| <p><b>9. Is a follow up diary or calendar available in your headache service?</b></p> <p><input type="radio"/> yes</p> <p><input type="radio"/> no</p> <p><input type="radio"/> don't know</p>                             | <p><b>B6d</b></p> |
| <p><b>10. Does a referral pathway exist from primary care to your headache service?</b></p> <p><input type="radio"/> yes</p> <p><input type="radio"/> no (go to 12)</p> <p><input type="radio"/> don't know (go to 12)</p> | <p><b>C1b</b></p> |
| <p><b>11. Does this pathway permit, and respond to, urgent referral when needed?</b></p> <p><input type="radio"/> yes</p> <p><input type="radio"/> no</p> <p><input type="radio"/> don't know</p>                          | <p><b>C2b</b></p> |
| <p><b>12. Are information leaflets for headache patients available in your headache service?</b></p> <p><input type="radio"/> yes</p> <p><input type="radio"/> no</p> <p><input type="radio"/> don't know</p>              | <p><b>D1</b></p>  |
| <p><b>13. Are you satisfied with the cleanliness and comfort of the environment in your headache service?</b></p> <p><input type="radio"/> yes</p> <p><input type="radio"/> no</p>                                         | <p><b>E1b</b></p> |
| <p><b>14. Do you in general think patients' waiting times in the clinic are acceptable?</b></p> <p><input type="radio"/> yes</p> <p><input type="radio"/> no</p>                                                           | <p><b>E3b</b></p> |

**15. Is your headache service equally accessible for all patients who need it?**

(if access to the service depends on ability to pay or another restriction unrelated to clinical need, answer "no")

- yes
- no
- don't know

**16. Is an outcome measure available in your headache service that is based on self-reported symptom burden?**

- yes
- no
- don't know

**17. Is an outcome measure available in your headache service that is based on self-reported disability burden?**

- yes
- no
- don't know

**18. Is an outcome measure available in your headache service that is based on self-reported quality of life?**

- yes
- no
- don't know

**19. Does a protocol (rules and written procedures) for reporting serious adverse events exist in your headache service?**

- yes
- no
- don't know

|            |
|------------|
| <b>G4</b>  |
| <b>H1b</b> |
| <b>H2b</b> |
| <b>H3b</b> |
| <b>I2b</b> |

Please add further comments, if any, below:

**Thank you for completing the questionnaire. Please return it to [local collaborator]**
